# Supplementary material for: Optimization of RT-QuIC Assay Duration for Screening Chronic Wasting Disease in White-Tailed Deer
Source: MDPI journal article supplement (doi:10.3390/vetsci11020060), 2024-02-01
Supplement: s1 [file s1]

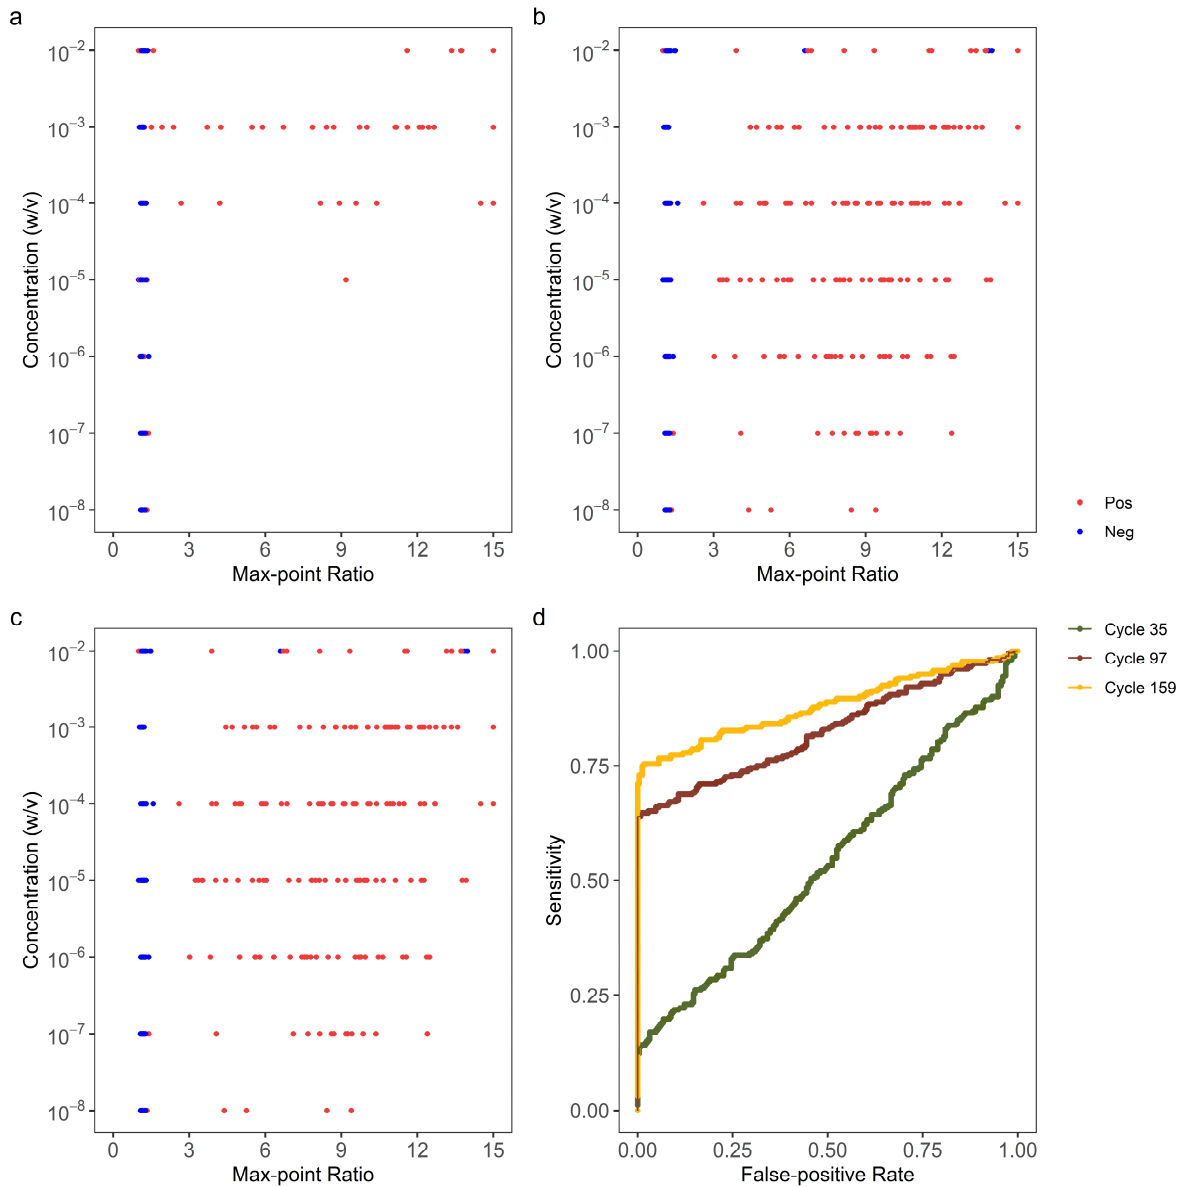

Supplementary Figure 2: Examples of distributions of real-time quaking-induced conversion (RT-QuIC) max-point ratios (MPR) with retropharyngeal lymph node (RLN) homogenates at various assay durations. MPR distributions of CWD- and CWD+ controls of a gradient concentration were generated for assay durations corresponding to the a) 35<sup>th</sup> (10 hours), b) 97<sup>th</sup> (28 hours), and c) 159<sup>th</sup> (46 hours) cycle and were capped at 15 for a)-c). Receiver operating characteristic curves (d) were constructed using replicates from the  $10^{-3}$  to  $10^{-8}$  w/v concentrations to show the classifying power of MPR with RLN at various assay durations.
