# Supplementary material for: Optimization of RT-QuIC Assay Duration for Screening Chronic Wasting Disease in White-Tailed Deer
Source: MDPI journal article supplement (doi:10.3390/vetsci11020060), 2024-02-01
Supplement: s1 [file s1]

Table S1: Number of obex and retropharyngeal lymph node (RLN) replicates used to construct receiver operating characteristic (ROC) curves to optimize real-time quaking-induced conversion (RT-QuIC) assay duration for detecting chronic wasting disease (CWD)

| Concentration (w/v) | Obex Replicates | RLN Replicates |
|---------------------|-----------------|----------------|
| $10^{-2}$           | 30              | 42             |
| $10^{-3}$           | 36              | 42             |
| $10^{-4}$           | 42              | 42             |
| $10^{-5}$           | 36              | 42             |
| $10^{-6}$           | 36              | 42             |
| $10^{-7}$           | 30              | 42             |
| $10^{-8}$           | 30              | 42             |
| $10^{-9}$           | 30              | 30             |
| $10^{-10}$          | 6               | 0              |
| $10^{-11}$          | 6               | 0              |

Five CWD- and five CWD- obex and retropharyngeal node specimens that were confirmed by immunohistochemistry were used to generate distributions of RT-QuIC cycle thresholds and max-point ratios. The number of replicates denotes the number of technical replicates per tissue at a specific concentration for both positive and negative specimens. To construct the ROC curves, the  $10^{-4}$  to  $10^{-8}$  dilutions were used for obex, while the  $10^{-3}$  to  $10^{-8}$  dilutions were used for RLN, and at each dilution at least 6 replicates from each specimen were included.

Table S2: Screening chronic wasting disease (CWD) in 104 white-tailed deer by RT-QuIC based on cycle threshold<sup>1</sup> and enzyme-linked immunosorbent assay (ELISA)

| RT-QuIC         |                     |         |                           |         |       |
|-----------------|---------------------|---------|---------------------------|---------|-------|
| ID <sup>2</sup> | Mann-Whitney U Test |         | Probability test          |         |       |
|                 | P-value             | Pos/Neg | #Pos/#tested <sup>3</sup> | Pos/Neg | ELISA |
| Obex-1          | 0.227               | Neg     | 1/8                       | Neg     | Neg   |
| Obex-7          | 0.011               | Pos     | 4/4                       | Pos     | Pos   |
| Obex-8          | 0.227               | Neg     | 3/8                       | Neg     | Neg   |
| Obex-18         | 0.227               | Neg     | 1/8                       | Neg     | Neg   |
| Obex-19         | 0.011               | Pos     | 4/4                       | Pos     | Pos   |
| Obex-20         | 0.011               | Pos     | 4/4                       | Pos     | Pos   |
| Obex-25         | 0.227               | Neg     | 1/8                       | Neg     | Neg   |
| Obex-26         | 0.227               | Neg     | 1/8                       | Neg     | Neg   |
| Obex-28         | 0.227               | Neg     | 1/8                       | Neg     | Neg   |
| Obex-29         | 0.093               | Neg     | 2/8                       | Neg     | Neg   |
| Obex-34         | 0.227               | Neg     | 2/8                       | Neg     | Neg   |
| Obex-35         | 0.227               | Neg     | 1/8                       | Neg     | Neg   |
| Obex-37         | 0.227               | Neg     | 1/8                       | Neg     | Neg   |
| Obex-39         | 0.227               | Neg     | 1/8                       | Neg     | Neg   |
| Obex-45         | 0.011               | Pos     | 4/4                       | Pos     | Pos   |
| Obex-46         | 0.227               | Neg     | 1/8                       | Neg     | Neg   |
| Obex-55         | 0.011               | Pos     | 4/4                       | Pos     | Pos   |
| Obex-56         | 0.227               | Neg     | 2/8                       | Neg     | Neg   |
| Obex-68         | 0.876               | Neg     | 1/8                       | Neg     | Neg   |
| Obex-71         | 0.876               | Neg     | 1/8                       | Neg     | Neg   |
| Obex-73         | 0.876               | Neg     | 1/8                       | Neg     | Neg   |
| Obex-75         | 0.690               | Neg     | 2/8                       | Neg     | Neg   |
| Obex-78         | 0.876               | Neg     | 1/8                       | Neg     | Neg   |
| Obex-79         | 0.876               | Neg     | 1/8                       | Neg     | Neg   |
| Obex-80         | 0.796               | Neg     | 2/8                       | Neg     | Neg   |
| Obex-82         | 0.779               | Neg     | 2/8                       | Neg     | Neg   |
| Obex-84         | 0.876               | Neg     | 1/8                       | Neg     | Neg   |
| Obex-97         | 0.500               | Neg     | 3/8                       | Neg     | Neg   |
| Obex-98         | 0.647               | Neg     | 1/8                       | Neg     | Neg   |
| Obex-100        | 0.500               | Neg     | 1/8                       | Neg     | Neg   |
| RLN-7           | 0.013               | Pos     | 4/4                       | Pos     | Pos   |
| RLN-8           | 0.062               | Neg     | 3/8                       | Neg     | Neg   |
| RLN-9           | 0.500               | Neg     | 1/8                       | Neg     | Neg   |
| RLN-18          | 0.647               | Neg     | 1/8                       | Neg     | Neg   |
| RLN-19          | 0.013               | Pos     | 4/4                       | Pos     | Pos   |
| RLN-20          | 0.013               | Pos     | 4/4                       | Pos     | Pos   |
| RLN-21          | 0.500               | Neg     | 1/8                       | Neg     | Neg   |
| RLN-28          | 0.500               | Neg     | 1/8                       | Neg     | Neg   |

|         |       |     |     |     |     |
|---------|-------|-----|-----|-----|-----|
| RLN-38  | 0.500 | Neg | 1/8 | Neg | Neg |
| RLN-39  | 0.500 | Neg | 1/8 | Neg | Neg |
| RLN-40  | 0.500 | Neg | 1/8 | Neg | Neg |
| RLN-45  | 0.011 | Pos | 4/4 | Pos | Pos |
| RLN-55  | 0.011 | Pos | 4/4 | Pos | Pos |
| RLN-61  | 0.093 | Neg | 2/8 | Neg | Neg |
| RLN-77  | 0.227 | Neg | 1/8 | Neg | Neg |
| RLN-88  | 0.227 | Neg | 1/8 | Neg | Neg |
| RLN-92  | 0.227 | Neg | 1/8 | Neg | Neg |
| RLN-100 | 0.227 | Neg | 1/8 | Neg | Neg |

1. Obex and retropharyngeal lymph node tissue specimens from 104 white-tailed deer were tested by RT-QuIC in quadruplicate with an assay duration of 33 hours and 30 hours, respectively. CWD positivity was determined using the Mann-Whitney U-test or the probability test based on cycle threshold ( $T_{\text{stdev}}$ ). When specimens had one or two replicate(s) crossed  $T_{\text{stdev}}$ , the specimens were re-tested in quadruplicate.
2. This table lists tissue specimens that were determined CWD positive using the Mann-Whitney U-test or had at least one replicate crossed  $T_{\text{stdev}}$ .
3. A total of 8 replicates were tested when specimens were subjected to re-testing.

Table S3: Screening chronic wasting disease in 104 white-tailed deer by RT-QulC based on MPR<sup>1</sup> and ELISA

| RT-QulC         |              |         |                           |         |       |
|-----------------|--------------|---------|---------------------------|---------|-------|
| ID <sup>2</sup> | Welch T Test |         | Probability test          |         |       |
|                 | P-value      | Pos/Neg | #Pos/#tested <sup>3</sup> | Pos/Neg | ELISA |
| Obex-1          | 0.192        | Neg     | 1/8                       | Neg     | Neg   |
| Obex-7          | 4E-05        | Pos     | 4/4                       | Pos     | Pos   |
| <b>Obex-10</b>  | 0.029        | Pos     | 0/4                       | Neg     | Neg   |
| <b>Obex-12</b>  | 0.009        | Pos     | 0/4                       | Neg     | Neg   |
| Obex-18         | 0.195        | Neg     | 1/8                       | Neg     | Neg   |
| Obex-19         | 0.007        | Pos     | 7/8                       | Pos     | Pos   |
| Obex-20         | 4E-04        | Pos     | 4/4                       | Pos     | Pos   |
| Obex-25         | 0.240        | Neg     | 1/8                       | Neg     | Neg   |
| Obex-29         | 0.141        | Neg     | 2/8                       | Neg     | Neg   |
| Obex-34         | 0.259        | Neg     | 1/8                       | Neg     | Neg   |
| Obex-37         | 0.297        | Neg     | 1/8                       | Neg     | Neg   |
| Obex-45         | 0.008        | Pos     | 4/4                       | Pos     | Pos   |
| Obex-55         | 0.009        | Pos     | 4/4                       | Pos     | Pos   |
| Obex-56         | 0.207        | Neg     | 2/8                       | Neg     | Neg   |
| Obex-75         | 0.466        | Neg     | 1/8                       | Neg     | Neg   |
| Obex-80         | 0.312        | Neg     | 2/8                       | Neg     | Neg   |
| Obex-97         | 0.535        | Neg     | 1/8                       | Neg     | Neg   |
| Obex-100        | 0.614        | Neg     | 1/8                       | Neg     | Neg   |
| RLN-7           | 0.004        | Pos     | 4/4                       | Pos     | Pos   |
| RLN-8           | 0.099        | Neg     | 3/8                       | Neg     | Neg   |
| RLN-9           | 0.316        | Neg     | 2/8                       | Neg     | Neg   |
| RLN-18          | 0.492        | Neg     | 1/8                       | Neg     | Neg   |
| RLN-19          | 2E-04        | Pos     | 4/4                       | Pos     | Pos   |
| RLN-20          | 7E-05        | Pos     | 4/4                       | Pos     | Pos   |
| RLN-21          | 0.346        | Neg     | 1/8                       | Neg     | Neg   |
| RLN-28          | 0.753        | Neg     | 1/8                       | Neg     | Neg   |
| RLN-35          | 0.632        | Neg     | 1/8                       | Neg     | Neg   |
| RLN-38          | 0.400        | Neg     | 1/8                       | Neg     | Neg   |
| RLN-39          | 0.760        | Neg     | 1/8                       | Neg     | Neg   |
| RLN-40          | 0.451        | Neg     | 1/8                       | Neg     | Neg   |
| <b>RLN-43</b>   | 0.005        | Pos     | 0/4                       | Neg     | Neg   |
| RLN-45          | 2E-04        | Pos     | 4/4                       | Pos     | Pos   |
| <b>RLN-49</b>   | 0.010        | Pos     | 0/4                       | Neg     | Neg   |
| <b>RLN-54</b>   | 0.005        | Pos     | 0/4                       | Neg     | Neg   |
| RLN-55          | 0.002        | Pos     | 4/4                       | Pos     | Pos   |
| <b>RLN-57</b>   | 0.012        | Pos     | 0/4                       | Neg     | Neg   |
| <b>RLN-58</b>   | 0.002        | Pos     | 0/4                       | Neg     | Neg   |
| <b>RLN-60</b>   | 0.016        | Pos     | 0/4                       | Neg     | Neg   |

|               |       |     |     |     |     |
|---------------|-------|-----|-----|-----|-----|
| RLN-61        | 0.104 | Neg | 2/8 | Neg | Neg |
| RLN-62        | 0.133 | Neg | 1/8 | Neg | Neg |
| <b>RLN-63</b> | 0.031 | Pos | 0/4 | Neg | Neg |
| RLN-77        | 0.207 | Neg | 1/8 | Neg | Neg |
| RLN-84        | 0.273 | Neg | 1/8 | Neg | Neg |
| RLN-88        | 0.326 | Neg | 1/8 | Neg | Neg |
| RLN-92        | 0.264 | Neg | 1/8 | Neg | Neg |
| RLN-100       | 0.355 | Neg | 1/8 | Neg | Neg |

1. Obex and RLN tissue specimens from 104 white-tailed deer were tested by RT-QuIC in quadruplicate with an assay duration of 102 cycles (29 hours) and 110 cycles (32 hours) for obex and RLN, respectively. CWD positivity was determined using the Welch's t-test or the probability test based on MPR threshold ( $T_{MPR}$ ) of 3.36 and 2.00 for obex and RLN, respectively. When specimens had one or two replicate(s) crossed  $T_{MPR}$ , the specimens were re-tested in quadruplicate. False-positive samples by the Welch T test are bolded.
2. This table lists tissue specimens that were determined CWD positive using the Welch's t-test or had at least one replicate crossed  $T_{MPR}$ .
3. A total of 8 replicates were tested when specimens were subjected to re-testing.

Table S4: Replicate-level comparison of RT-QuIC screening of 104 white-tailed deer at various assay durations and classifier thresholds

| Tissue | Classifier | Assay Duration (h) | Signal threshold <sup>1</sup> | TP <sup>2</sup> | TN <sup>3</sup> | FP <sup>4</sup> | FN <sup>5</sup> | % Agreement <sup>6</sup> |
|--------|------------|--------------------|-------------------------------|-----------------|-----------------|-----------------|-----------------|--------------------------|
| Obex   | Ct         | 33                 | T <sub>stdev</sub>            | 20              | 369             | 27              | 0               | 93.51%                   |
| RLN    | Ct         | 30                 | T <sub>stdev</sub>            | 20              | 380             | 16              | 0               | 96.15%                   |
| Obex   | Ct         | 40                 | T <sub>stdev</sub>            | 20              | 352             | 44              | 0               | 89.42%                   |
| RLN    | Ct         | 40                 | T <sub>stdev</sub>            | 20              | 361             | 35              | 0               | 91.59%                   |
| Obex   | MPR        | 29                 | T <sub>MPR</sub> = 3.36       | 19              | 384             | 12              | 1               | 96.88%                   |
| RLN    | MPR        | 31                 | T <sub>MPR</sub> = 2.00       | 20              | 382             | 14              | 0               | 96.63%                   |
| Obex   | MPR        | 40                 | T <sub>MPR</sub> = 3.36       | 20              | 356             | 40              | 0               | 90.38%                   |
| RLN    | MPR        | 40                 | T <sub>MPR</sub> = 2.54       | 20              | 365             | 31              | 0               | 92.55%                   |

1. T<sub>stdev</sub> was defined per plate as the first-cycle reading of all tested wells plus 10 sample standard deviations. T<sub>MPR</sub> was defined per sample as a ratio to the reading in the 4<sup>th</sup> cycle (~52 min).
2. TP was defined as a replicate that crossed T<sub>stdev</sub> or T<sub>MPR</sub> within the assay duration and was derived from an ELISA-positive sample.
3. TN was defined as a replicate that did not cross T<sub>stdev</sub> or T<sub>MPR</sub> within the assay duration and was derived from an ELISA-negative sample.
4. FP was defined as a replicate that crossed T<sub>stdev</sub> or T<sub>MPR</sub> within the assay duration and was derived from an ELISA-negative sample.
5. FN was defined as a replicate that did not cross T<sub>stdev</sub> or T<sub>MPR</sub> within the assay duration and was derived from an ELISA-positive sample.
6. % agreement was calculated as  $\frac{TP+TN}{TP+TN+FP+FN}$

Table S5: Contingency tables for a replicate-level McNemar test<sup>1</sup> between optimized assay durations and a 40 h assay duration

| Threshold           | Tissue | Pos<br>(40 h) &<br>Pos<br>(optimized) | Pos<br>(40 h) &<br>Neg<br>(optimized) | Neg<br>(40 h) &<br>Pos<br>(optimized) | Neg<br>(40 h) &<br>Neg<br>(optimized) | McNemar's<br>Statistic | $p^2$    |
|---------------------|--------|---------------------------------------|---------------------------------------|---------------------------------------|---------------------------------------|------------------------|----------|
| $T_{\text{stddev}}$ | Obex   | 31                                    | 33                                    | 352                                   | 0                                     | 31.0                   | 2.54E-08 |
| $T_{\text{stddev}}$ | RLN    | 36                                    | 19                                    | 361                                   | 0                                     | 17.1                   | 3.64E-05 |
| $T_{\text{MPR}}$    | Obex   | 31                                    | 29                                    | 356                                   | 0                                     | 27.0                   | 2.00E-07 |
| $T_{\text{MPR}}$    | RLN    | 40                                    | 11                                    | 365                                   | 0                                     | 9.1                    | 2.57E-03 |

1. Obex and RLN tissue specimens from 104 white-tailed deer were tested by RT-QuIC in quadruplicate with an assay duration of 33 hours for obex and 30 hours for RLN with  $T_{\text{stddev}}$ , and 29 hours and 32 hours for obex and RLN with  $T_{\text{MPR}}$ , respectively.  $T_{\text{stddev}}$  was defined per plate as the average of all tested wells plus 10 standard deviations.  $T_{\text{MPR}}$  was defined per well as the maximum fluorescence over the fluorescence at the fourth reading, and was set to 3.36 and 2.00 for obex and RLN at the optimized durations, respectively, and 3.36 and 2.54 at 40 hours, for obex and RLN, respectively.
2. The probability value (P) was calculated using 1 degree of freedom.
