# Supplementary material for: Optimization of RT-QuIC Assay Duration for Screening Chronic Wasting Disease in White-Tailed Deer
Source: MDPI journal article supplement (doi:10.3390/vetsci11020060), 2024-02-01
Supplement: s1 [file s1]

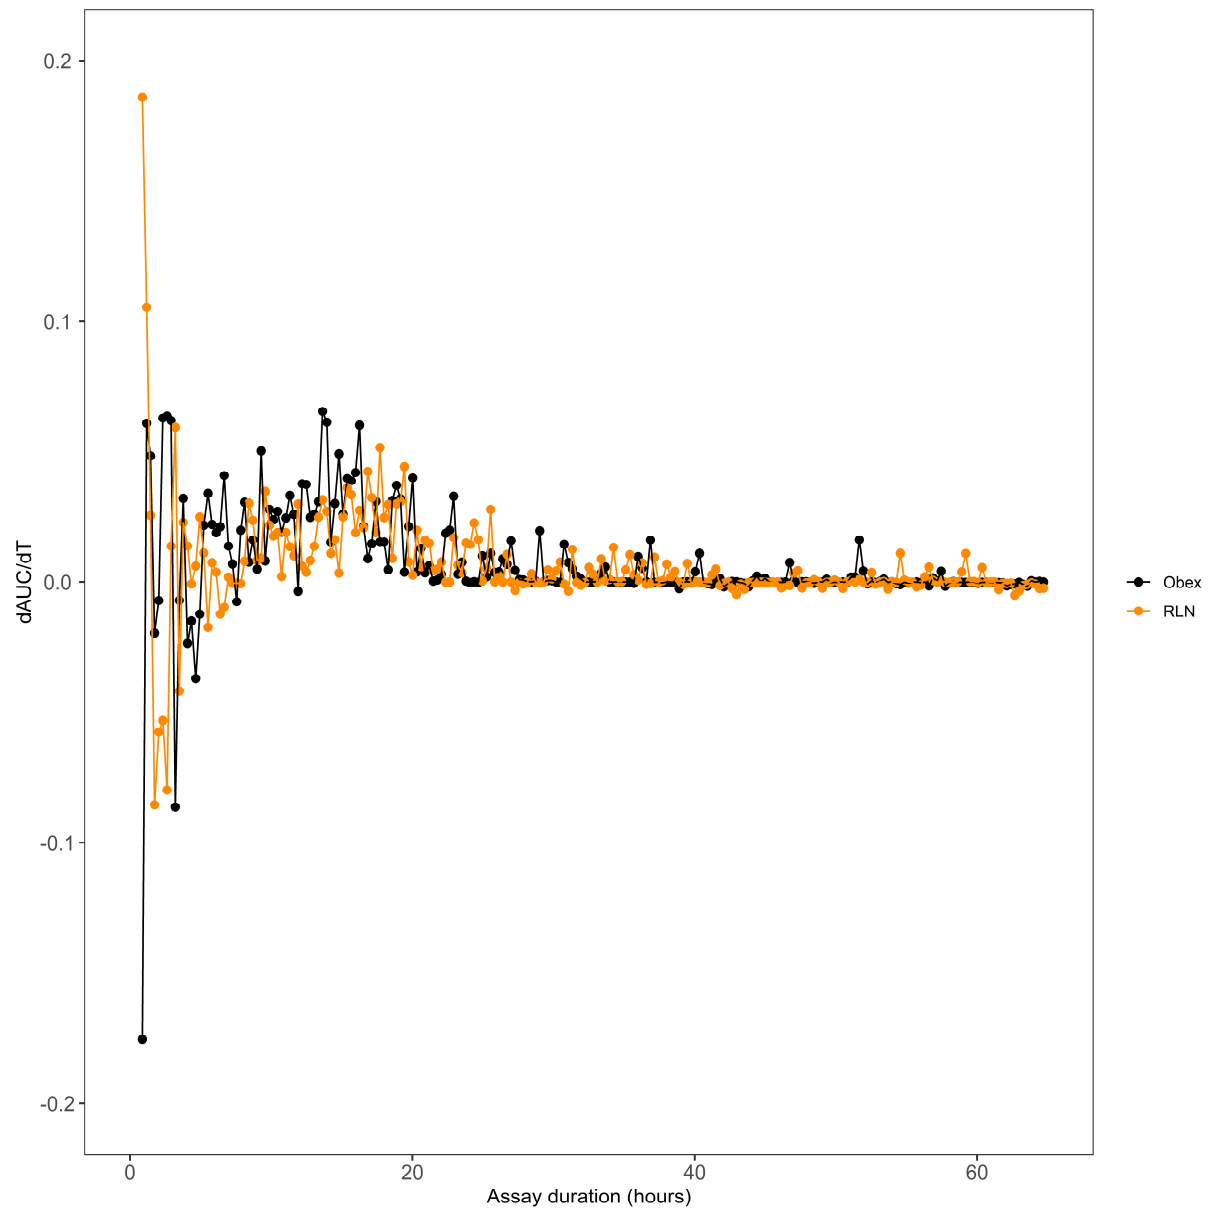

Supplementary Figure 3: Rate of change of area under the curve (AUC) of receiver operating characteristic (ROC) curves constructed with max-point ratio (MPR) with increasing assay durations. ROC curves were constructed using MPR distributions of CWD- and CWD+ controls of a gradient concentration ( $10^{-4}$  to  $10^{-8}$  for obex,  $10^{-3}$  to  $10^{-8}$  for RLN) with increasing duration. The rate of change of AUC with each addition of a real-time quaking-induced conversion cycle is shown against the assay duration.
